# Supplementary material for: Two series of Ln(iii)–Ag(i) heterometallic–organic frameworks constructed from isonicotinate and 2,2′-biphenyldicarboxylate: synthesis, structure and photoluminescence properties
Source: Royal Society of Chemistry journal article supplement (doi:10.1039/c5ce00478k), 2015-01-01
Supplement: c5ce00478k1.pdf [file c5ce00478k1.pdf]

## Supporting Information

### Two Series of Ln(III)-Ag(I) Heterometallic-Organic Frameworks Constructed from Isonicotinate and 2, 2'-Biphenyldicarboxylate: Synthesis, Structure and Photoluminescent Property

Xiao-Ming Lin,<sup>a,b</sup> Yu-Jia Ding,<sup>a</sup> Shui-Mei Liang,<sup>a</sup> Si-Xiao Ge,<sup>a</sup> Lei-Ming Wei,<sup>a</sup> Ji-Qing Xie<sup>c</sup>,

Gang Zhang<sup>b</sup> and Yue-Peng Cai<sup>\*a</sup>

<sup>a</sup> School of Chemistry and Environment, South China Normal University; Guangzhou Key Laboratory of Materials for Energy Conversion and Storage, 510006, P.R. China, E-mail: caiyp@scnu.edu.cn

<sup>b</sup> State Key Laboratory of Supramolecular Structure and Material, Jilin University, Changchun, 130012, P.R. China.

<sup>c</sup>Guangdong Engineering Technology Research Center of Low Carbon and Advanced Energy Materials, Guangzhou 510631, China

#### Contents

- 1. Table S1.** Selected bond lengths and angles for compounds **1-6**
- Figure S1.** (a) View of the 2-D network stacked in an offset fashion along the *ac* plane; (b) A space-filling view of the porous network showing 1D channels along the crystallographic *c*-axis in **1** (guest molecules and nitrate anions are omitted for clarity).
- Figure S2.** (a) Parallel stacking of 2D layers; (b) A space-filling view of the porous network showing 1D channels along the crystallographic *b*-axis in **5** (guest molecules and nitrate anions are omitted for clarity).
- Figure S3-S5.** The IR spectra of compounds **1-6**.
- Figure S6.** TGA curves of compounds **1** and **2**.
- Figure S7.** TGA curves of compounds **5** and **6**.
- Figure S8.** Solid-state emission spectra of **1** ( $\lambda_{\text{ex}} = 329$  nm) and **6** ( $\lambda_{\text{ex}} = 330$  nm) at room temperature, photoluminescent emission of **1** (dot blue curve) and **6** (dot red curve) recovers by immersed into acetonitrile at room temperature.
- Figure S9.** (a) Spectra and (b) the  $^5D_0 \rightarrow ^7F_2$  transition (619 nm) intensities of **2** in various pure solvent when excited at 325 nm.

9. **Figure S10.** The  ${}^4F_{3/2} \rightarrow {}^4I_{11/2}$  transition (1063 nm) intensities of **1** in various pure solvent when excited at 329 nm.
10. **Figure S11.** The  ${}^2F_{5/2} \rightarrow {}^7I_{7/2}$  transition (981 nm) intensities of **6** in various pure solvent when excited at 330 nm.
11. **Figure S12.** The  ${}^4F_{3/2} \rightarrow {}^4I_{11/2}$  transition (1063 nm) intensities of **1** after immersing in different amounts of chloroform,  $\lambda_{\text{ex}}=329$  nm.
12. **Figure S13.** The  ${}^5D_0 \rightarrow {}^7F_2$  transition (619 nm) intensities of **2** after immersing in different amounts of chloroform,  $\lambda_{\text{ex}}=325$  nm.
13. **Figure S14.** The  ${}^5D_4 \rightarrow {}^7F_5$  transition (544 nm) intensities of **3** after immersing in different amounts of chloroform,  $\lambda_{\text{ex}}=319$  nm.
14. **Figure S15.** The  ${}^2F_{5/2} \rightarrow {}^7I_{7/2}$  transition (981 nm) intensities of **6** after immersing in different amounts of chloroform,  $\lambda_{\text{ex}}=330$  nm.
15. **Table S2.** Structural pore size and solvent molecular sizes.

**Table S1.** Selected bond lengths (Å) and bond angles (°) for **1-6**.

| Compound 1          |           |                     |          |
|---------------------|-----------|---------------------|----------|
| Nd(1)-O(4)#1        | 2.529(9)  | O(4)#1-Nd(1)-O(6)#2 | 146.7(3) |
| Nd(1)-O(1W)         | 2.556(9)  | O(1W)-Nd(1)-O(6)#2  | 77.8(4)  |
| Nd(1)-O(2W)         | 2.559(9)  | O(2W)-Nd(1)-O(6)#2  | 69.4(3)  |
| Nd(1)-O(5)#1        | 2.582(9)  | O(5)#1-Nd(1)-O(6)#2 | 108.1(3) |
| Nd(1)-O(2)          | 2.598(9)  | O(2)-Nd(1)-O(6)#2   | 135.6(3) |
| Nd(1)-O(6)#2        | 2.613(10) | O(4)#1-Nd(1)-O(3)   | 107.9(3) |
| Nd(1)-O(3)          | 2.649(9)  | O(1W)-Nd(1)-O(3)    | 143.5(3) |
| Nd(1)-O(1)          | 2.667(8)  | O(2W)-Nd(1)-O(3)    | 79.7(3)  |
| Nd(1)-O(4)          | 2.789(9)  | O(5)#1-Nd(1)-O(3)   | 143.6(3) |
| Nd(1)-O(5)#2        | 2.793(8)  | O(2)-Nd(1)-O(3)     | 72.2(3)  |
| Ag(1)-N(1)#3        | 2.165(12) | O(6)#2-Nd(1)-O(3)   | 76.3(3)  |
| Ag(1)-N(1)          | 2.165(12) | O(4)#1-Nd(1)-O(1)   | 122.3(3) |
| O(4)#1-Nd(1)-O(1W)  | 81.3(3)   | O(1W)-Nd(1)-O(1)    | 136.7(3) |
| O(4)#1-Nd(1)-O(2W)  | 78.8(3)   | O(2W)-Nd(1)-O(1)    | 145.9(3) |
| O(1W)-Nd(1)-O(2W)   | 67.4(3)   | O(5)#1-Nd(1)-O(1)   | 75.1(3)  |
| O(4)#1-Nd(1)-O(5)#1 | 88.1(3)   | O(2)-Nd(1)-O(1)     | 49.2(3)  |
| O(1W)-Nd(1)-O(5)#1  | 69.6(3)   | O(6)#2-Nd(1)-O(1)   | 90.4(3)  |
| O(2W)-Nd(1)-O(5)#1  | 136.4(3)  | O(1)-Nd(1)-O(4)     | 100.0(3) |
| O(4)#1-Nd(1)-O(2)   | 74.2(3)   | O(2W)-Nd(1)-O(5)#2  | 109.4(3) |
| O(1W)-Nd(1)-O(2)    | 142.6(4)  | O(3)-Nd(1)-O(5)#2   | 108.1(3) |
| O(2W)-Nd(1)-O(2)    | 132.0(3)  | O(4)-Nd(1)-O(5)#2   | 154.9(3) |
| O(5)#1-Nd(1)-O(2)   | 81.7(3)   | N(1)#3-Ag(1)-N(1)   | 176.1(8) |

Symmetry transformations used to generate equivalent atoms: #1 -x+1/2,-y+1/2,-z+1; #2 x,y-1,z; #3 -x+1,y,-z+1/2;

#4 x,y+1,z; #5 -x+1,-y+1,-z+1.

| Compound 2          |           |                   |            |
|---------------------|-----------|-------------------|------------|
| Eu(1)-O(4)#1        | 2.480(5)  | O(4)#1-Eu(1)-O(2) | 74.57(17)  |
| Eu(1)-O(1W)         | 2.502(5)  | O(1W)-Eu(1)-O(2)  | 142.3(2)   |
| Eu(1)-O(2W)         | 2.517(5)  | O(2W)-Eu(1)-O(2)  | 131.25(18) |
| Eu(1)-O(5)#1        | 2.531(5)  | O(5)#1-Eu(1)-O(2) | 81.13(18)  |
| Eu(1)-O(6)#2        | 2.545(6)  | O(6)#2-Eu(1)-O(2) | 135.31(19) |
| Eu(1)-O(2)          | 2.556(5)  | O(4)#1-Eu(1)-O(3) | 108.19(17) |
| Eu(1)-O(3)          | 2.579(5)  | O(1W)-Eu(1)-O(3)  | 143.51(19) |
| Eu(1)-O(1)          | 2.607(5)  | O(2W)-Eu(1)-O(3)  | 78.39(19)  |
| Eu(1)-O(5)#2        | 2.791(5)  | O(5)#1-Eu(1)-O(3) | 143.87(17) |
| Eu(1)-O(4)          | 2.796(5)  | O(6)#2-Eu(1)-O(3) | 76.54(19)  |
| Ag(1)-N(1)#3        | 2.158(8)  | O(2)-Eu(1)-O(3)   | 72.38(19)  |
| Ag(1)-N(1)          | 2.158(8)  | O(4)#1-Eu(1)-O(1) | 123.60(17) |
| O(4)#1-Eu(1)-O(1W)  | 80.39(18) | O(1W)-Eu(1)-O(1)  | 136.35(18) |
| O(4)#1-Eu(1)-O(2W)  | 78.80(18) | O(2W)-Eu(1)-O(1)  | 144.65(19) |
| O(1W)-Eu(1)-O(2W)   | 68.42(19) | O(5)#1-Eu(1)-O(1) | 75.26(17)  |
| O(4)#1-Eu(1)-O(5)#1 | 87.24(17) | O(6)#2-Eu(1)-O(1) | 88.96(19)  |

|                     |            |                     |            |
|---------------------|------------|---------------------|------------|
| O(1W)-Eu(1)-O(5)#1  | 69.80(18)  | O(2)-Eu(1)-O(1)     | 50.20(17)  |
| O(2W)-Eu(1)-O(5)#1  | 137.53(18) | O(3)-Eu(1)-O(1)     | 68.97(18)  |
| O(4)#1-Eu(1)-O(6)#2 | 147.02(18) | O(4)#1-Eu(1)-O(5)#2 | 142.50(16) |
| O(1W)-Eu(1)-O(6)#2  | 78.2(2)    | O(1W)-Eu(1)-O(5)#2  | 70.43(17)  |
| O(2W)-Eu(1)-O(6)#2  | 70.11(19)  | O(2W)-Eu(1)-O(5)#2  | 110.13(17) |
| O(5)#1-Eu(1)-O(6)#2 | 108.26(17) | N(1)#3-Ag(1)-N(1)   | 176.0(5)   |

Symmetry transformations used to generate equivalent atoms: #1  $-x+1/2, -y+1/2, -z+1$ ; #2  $x, y+1, z$ ; #3  $-x+1, y, -z+1/2$ ; #4  $x, y-1, z$ ; #5  $-x, -y-1, -z+1$ .

#### Compound 3

|                     |            |                   |            |
|---------------------|------------|-------------------|------------|
| Tb(1)-O(3)#1        | 2.462(5)   | O(3)#1-Tb(1)-O(1) | 74.64(16)  |
| Tb(1)-O(1W)         | 2.477(5)   | O(1W)-Tb(1)-O(1)  | 142.33(18) |
| Tb(1)-O(6)#1        | 2.504(5)   | O(6)#1-Tb(1)-O(1) | 80.68(17)  |
| Tb(1)-O(2W)         | 2.518(5)   | O(2W)-Tb(1)-O(1)  | 131.51(18) |
| Tb(1)-O(5)#2        | 2.532(6)   | O(5)#2-Tb(1)-O(1) | 135.09(18) |
| Tb(1)-O(1)          | 2.546(5)   | O(3)#1-Tb(1)-O(4) | 108.55(17) |
| Tb(1)-O(4)          | 2.556(5)   | O(1W)-Tb(1)-O(4)  | 143.54(18) |
| Tb(1)-O(2)          | 2.586(5)   | O(6)#1-Tb(1)-O(4) | 143.44(16) |
| Tb(1)-O(3)          | 2.793(5)   | O(2W)-Tb(1)-O(4)  | 78.38(18)  |
| Tb(1)-O(6)#2        | 2.801(5)   | O(5)#2-Tb(1)-O(4) | 76.58(18)  |
| Ag(1)-N(1)#3        | 2.149(7)   | O(1)-Tb(1)-O(4)   | 72.24(18)  |
| Ag(1)-N(1)          | 2.149(7)   | O(3)#1-Tb(1)-O(2) | 124.18(17) |
| O(3)#1-Tb(1)-O(1W)  | 80.04(17)  | O(1W)-Tb(1)-O(2)  | 136.63(18) |
| O(3)#1-Tb(1)-O(6)#1 | 86.70(17)  | O(6)#1-Tb(1)-O(2) | 75.53(16)  |
| O(1W)-Tb(1)-O(6)#1  | 70.34(17)  | O(2W)-Tb(1)-O(2)  | 143.72(18) |
| O(3)#1-Tb(1)-O(2W)  | 79.44(17)  | O(5)#2-Tb(1)-O(2) | 88.10(18)  |
| O(1W)-Tb(1)-O(2W)   | 68.28(18)  | O(1)-Tb(1)-O(2)   | 50.68(17)  |
| O(6)#1-Tb(1)-O(2W)  | 137.98(17) | O(4)-Tb(1)-O(2)   | 68.40(17)  |
| O(3)#1-Tb(1)-O(5)#2 | 147.33(17) | O(3)#1-Tb(1)-O(3) | 61.25(18)  |
| O(1W)-Tb(1)-O(5)#2  | 78.43(18)  | O(1W)-Tb(1)-O(3)  | 122.94(16) |
| O(6)#1-Tb(1)-O(5)#2 | 108.52(17) | O(6)#1-Tb(1)-O(3) | 138.69(15) |
| O(2W)-Tb(1)-O(5)#2  | 69.89(18)  | N(1)#3-Ag(1)-N(1) | 176.4(5)   |

Symmetry transformations used to generate equivalent atoms: #1  $-x+1/2, -y+3/2, -z$ ; #2  $x, y-1, z$ ; #3  $-x, y, -z+1/2$ ; #4  $x, y+1, z$ ; #5  $-x+1, -y+1, -z$ .

#### Compound 4

|              |          |                   |            |
|--------------|----------|-------------------|------------|
| Dy(1)-O(3)#1 | 2.406(6) | O(3)#1-Dy(1)-O(1) | 74.41(19)  |
| Dy(1)-O(2W)  | 2.437(6) | O(2W)-Dy(1)-O(1)  | 143.0(2)   |
| Dy(1)-O(6)#1 | 2.467(6) | O(6)#1-Dy(1)-O(1) | 81.2(2)    |
| Dy(1)-O(1W)  | 2.469(6) | O(1W)-Dy(1)-O(1)  | 130.7(2)   |
| Dy(1)-O(5)#2 | 2.494(6) | O(5)#2-Dy(1)-O(1) | 134.0(2)   |
| Dy(1)-O(1)   | 2.512(6) | O(3)#1-Dy(1)-O(4) | 107.58(19) |
| Dy(1)-O(4)   | 2.532(6) | O(2W)-Dy(1)-O(4)  | 143.4(2)   |
| Dy(1)-O(2)   | 2.555(6) | O(6)#1-Dy(1)-O(4) | 144.14(19) |
| Dy(1)-O(6)#2 | 2.801(6) | O(1W)-Dy(1)-O(4)  | 77.3(2)    |

|                     |            |                     |            |
|---------------------|------------|---------------------|------------|
| Dy(1)-O(3)          | 2.850(6)   | O(5)#2-Dy(1)-O(4)   | 76.8(2)    |
| Ag(3)-N(1)#3        | 2.161(8)   | O(1)-Dy(1)-O(4)     | 71.7(2)    |
| Ag(3)-N(1)          | 2.162(8)   | O(3)#1-Dy(1)-O(2)   | 124.3(2)   |
| O(3)#1-Dy(1)-O(2W)  | 80.9(2)    | O(2W)-Dy(1)-O(2)    | 136.3(2)   |
| O(3)#1-Dy(1)-O(6)#1 | 86.5(2)    | O(6)#1-Dy(1)-O(2)   | 76.21(19)  |
| O(2W)-Dy(1)-O(6)#1  | 70.05(19)  | O(1W)-Dy(1)-O(2)    | 142.6(2)   |
| O(3)#1-Dy(1)-O(1W)  | 79.8(2)    | O(5)#2-Dy(1)-O(2)   | 86.7(2)    |
| O(2W)-Dy(1)-O(1W)   | 69.1(2)    | O(1)-Dy(1)-O(2)     | 51.0(2)    |
| O(6)#1-Dy(1)-O(1W)  | 138.46(19) | O(4)-Dy(1)-O(2)     | 68.6(2)    |
| O(3)#1-Dy(1)-O(5)#2 | 148.6(2)   | O(3)#1-Dy(1)-O(6)#2 | 141.67(18) |
| O(2W)-Dy(1)-O(5)#2  | 78.7(2)    | O(2W)-Dy(1)-O(6)#2  | 70.17(19)  |
| O(6)#1-Dy(1)-O(5)#2 | 108.3(2)   | O(6)#1-Dy(1)-O(6)#2 | 60.6(2)    |
| O(1W)-Dy(1)-O(5)#2  | 70.7(2)    | N(1)#3-Ag(3)-N(1)   | 176.0(6)   |

Symmetry transformations used to generate equivalent atoms: #1 -x+1/2,-y+1/2,-z; #2 x,y-1,z; #3 -x,y,-z+1/2; #4 x,y+1,z.

#### Compound 5

|                     |            |                     |            |
|---------------------|------------|---------------------|------------|
| Ho(1)-O(1)          | 2.280(4)   | O(6)#1-Ho(1)-O(3)   | 147.86(15) |
| Ho(1)-O(5)          | 2.296(4)   | O(2)#2-Ho(1)-O(3)   | 71.75(15)  |
| Ho(1)-O(6)#1        | 2.341(4)   | O(1W)-Ho(1)-O(3)    | 125.17(16) |
| Ho(1)-O(2)#2        | 2.344(4)   | O(1)-Ho(1)-O(4)#2   | 104.45(17) |
| Ho(1)-O(1W)         | 2.356(4)   | O(5)-Ho(1)-O(4)#2   | 151.49(15) |
| Ho(1)-O(3)          | 2.390(4)   | O(6)#1-Ho(1)-O(4)#2 | 75.87(15)  |
| Ho(1)-O(4)#2        | 2.445(4)   | O(2)#2-Ho(1)-O(4)#2 | 77.14(16)  |
| Ho(1)-O(3)#2        | 2.480(4)   | O(1W)-Ho(1)-O(4)#2  | 85.31(17)  |
| Ag(1)-N(1)          | 2.149(6)   | O(3)-Ho(1)-O(4)#2   | 124.05(14) |
| Ag(1)-N(1)#3        | 2.149(5)   | O(1)-Ho(1)-O(3)#2   | 73.20(14)  |
| O(1)-Ho(1)-O(5)     | 81.08(15)  | O(5)-Ho(1)-O(3)#2   | 150.77(14) |
| O(1)-Ho(1)-O(6)#1   | 76.33(16)  | O(6)#1-Ho(1)-O(3)#2 | 107.92(14) |
| O(5)-Ho(1)-O(6)#1   | 78.47(15)  | O(2)#2-Ho(1)-O(3)#2 | 76.56(14)  |
| O(1)-Ho(1)-O(2)#2   | 138.95(15) | O(1W)-Ho(1)-O(3)#2  | 132.01(15) |
| O(5)-Ho(1)-O(2)#2   | 117.24(15) | O(3)-Ho(1)-O(3)#2   | 75.50(15)  |
| O(6)#1-Ho(1)-O(2)#2 | 140.38(15) | O(4)#2-Ho(1)-O(3)#2 | 52.42(14)  |
| O(1)-Ho(1)-O(1W)    | 148.44(16) | O(6)#1-Ho(1)-O(1W)  | 77.20(16)  |
| O(5)-Ho(1)-O(1W)    | 77.05(16)  | N(1)-Ag(1)-N(1)#3   | 180.0(4)   |

Symmetry transformations used to generate equivalent atoms: #1 -x,-y+1,-z+1; #2 -x+1,-y+1,-z+1; #3 -x+1,-y,-z+2; #4 -x+2,-y+1,-z.

#### Compound 6

|              |          |                     |            |
|--------------|----------|---------------------|------------|
| Yb(1)-O(2)#1 | 2.280(4) | O(5)#2-Yb(1)-O(4)#1 | 147.81(14) |
| Yb(1)-O(6)#1 | 2.296(4) | O(1)-Yb(1)-O(4)#1   | 71.86(14)  |
| Yb(1)-O(5)#2 | 2.340(4) | O(1W)-Yb(1)-O(4)#1  | 125.40(15) |
| Yb(1)-O(1)   | 2.340(4) | O(2)#1-Yb(1)-O(3)   | 104.48(15) |
| Yb(1)-O(1W)  | 2.361(4) | O(6)#1-Yb(1)-O(3)   | 151.63(14) |
| Yb(1)-O(4)#1 | 2.388(4) | O(5)#2-Yb(1)-O(3)   | 75.94(14)  |
| Yb(1)-O(3)   | 2.444(4) | O(1)-Yb(1)-O(3)     | 77.08(15)  |

|                     |            |                     |            |
|---------------------|------------|---------------------|------------|
| Yb(1)-O(4)          | 2.480(4)   | O(1W)-Yb(1)-O(3)    | 84.90(15)  |
| Ag(1)-N(1)          | 2.152(5)   | O(4)#1-Yb(1)-O(3)   | 124.02(13) |
| Ag(1)-N(1)#3        | 2.152(5)   | O(2)#1-Yb(1)-O(4)   | 73.26(13)  |
| O(2)#1-Yb(1)-O(6)#1 | 80.89(14)  | O(6)#1-Yb(1)-O(4)   | 150.64(13) |
| O(2)#1-Yb(1)-O(5)#2 | 76.39(15)  | O(5)#2-Yb(1)-O(4)   | 107.98(13) |
| O(6)#1-Yb(1)-O(5)#2 | 78.46(14)  | O(1)-Yb(1)-O(4)     | 76.55(13)  |
| O(2)#1-Yb(1)-O(1)   | 138.98(14) | O(1W)-Yb(1)-O(4)    | 131.53(14) |
| O(6)#1-Yb(1)-O(1)   | 117.34(14) | O(4)#1-Yb(1)-O(4)   | 75.50(14)  |
| O(5)#2-Yb(1)-O(1)   | 140.32(14) | O(3)-Yb(1)-O(4)     | 52.35(13)  |
| O(2)#1-Yb(1)-O(1W)  | 148.70(14) | O(2)#1-Yb(1)-O(4)#1 | 74.15(14)  |
| O(6)#1-Yb(1)-O(1W)  | 77.67(15)  | O(6)#1-Yb(1)-O(4)#1 | 84.34(13)  |
| O(5)#2-Yb(1)-O(1W)  | 77.17(14)  | N(1)-Ag(1)-N(1)#3   | 179.999(1) |

Symmetry transformations used to generate equivalent atoms: #1 -x+1,-y+1,-z+1; #2 x-1,y,z; #3 -x+1,-y+2,-z; #4 x+1,y,z;  
#5 -x+2,-y+1,-z.

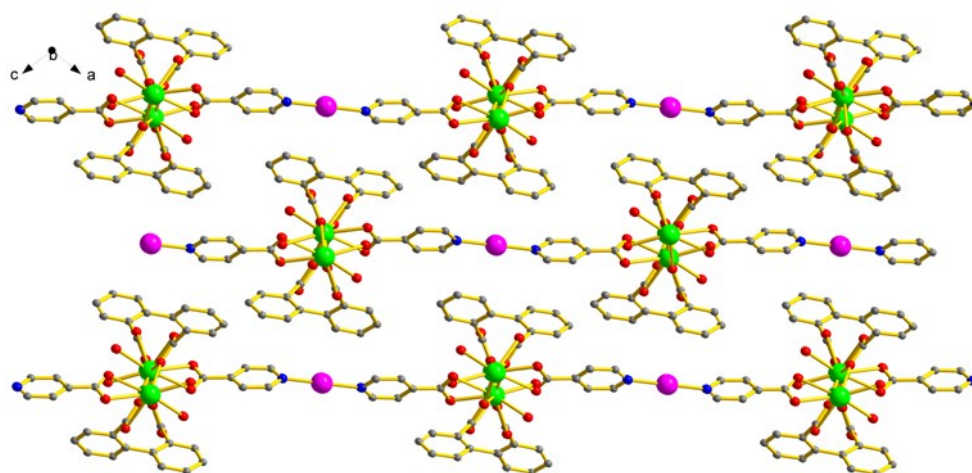

(b)

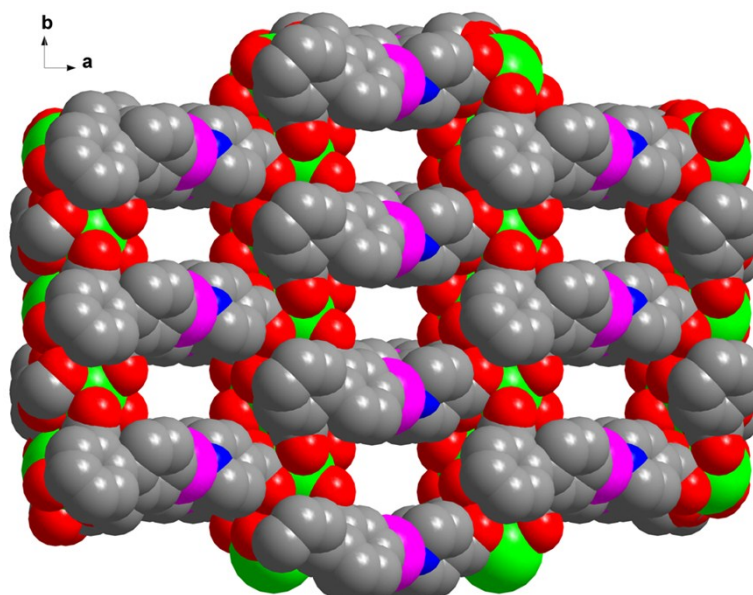

Figure S1. (a) View of the 2-D network stacked in an offset fashion along the *ac* plane; (b) A space-filling view of the porous network showing 1D channels along the crystallographic *c*-axis in **1** (guest molecules and nitrate anions are omitted for clarity).

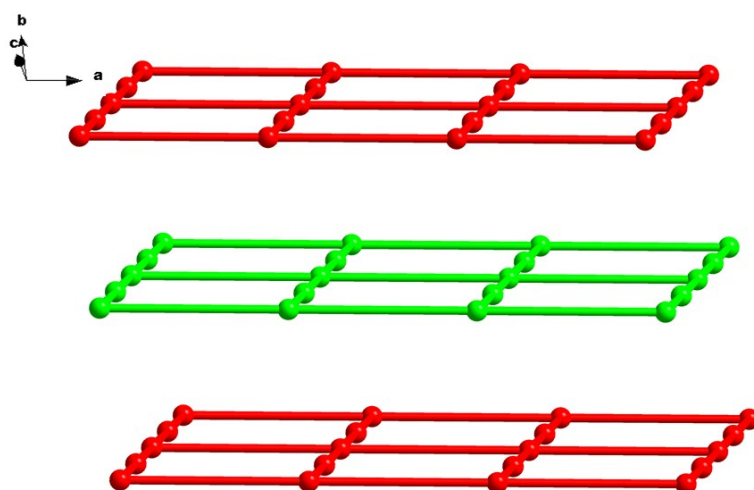

(b)

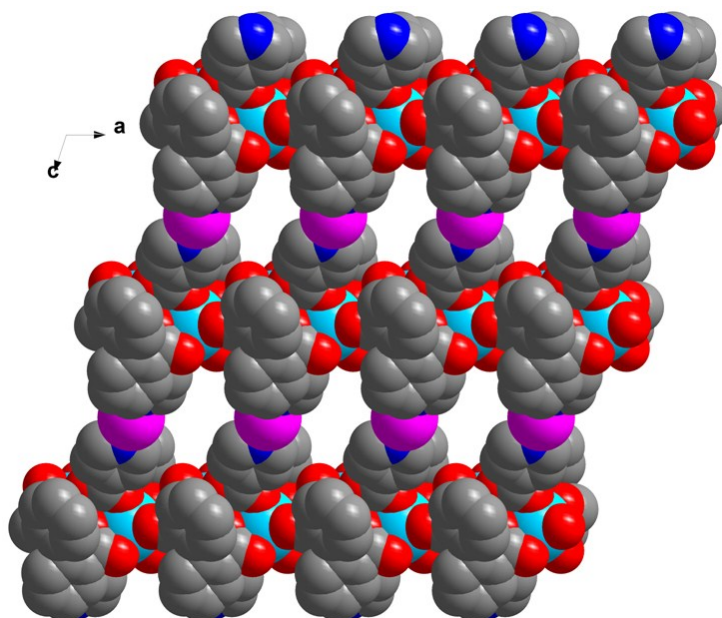

Figure S2. (a) Parallel stacking of 2D layers; (b) A space-filling view of the porous network showing 1D channels along the crystallographic  $b$ -axis in **5** (guest molecules and nitrate anions are omitted for clarity).



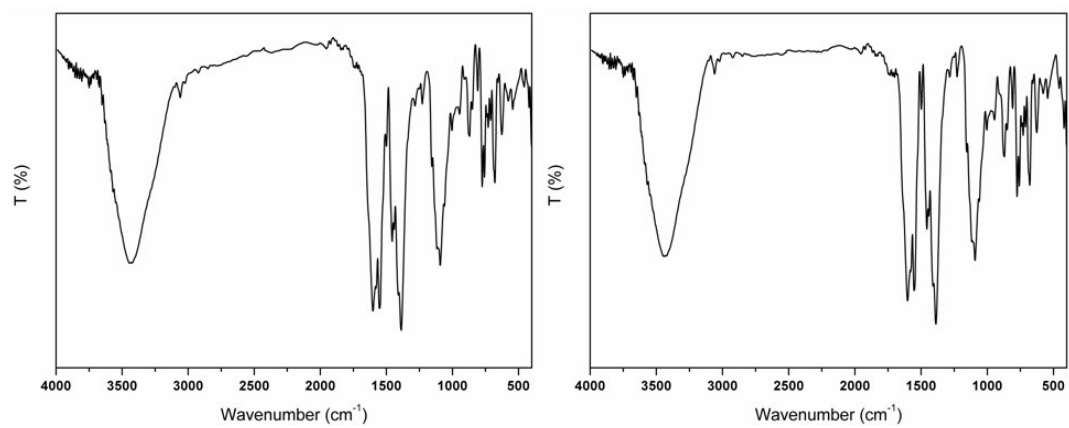

Figure S3. The IR spectra of **1** (left) and **2** (right).

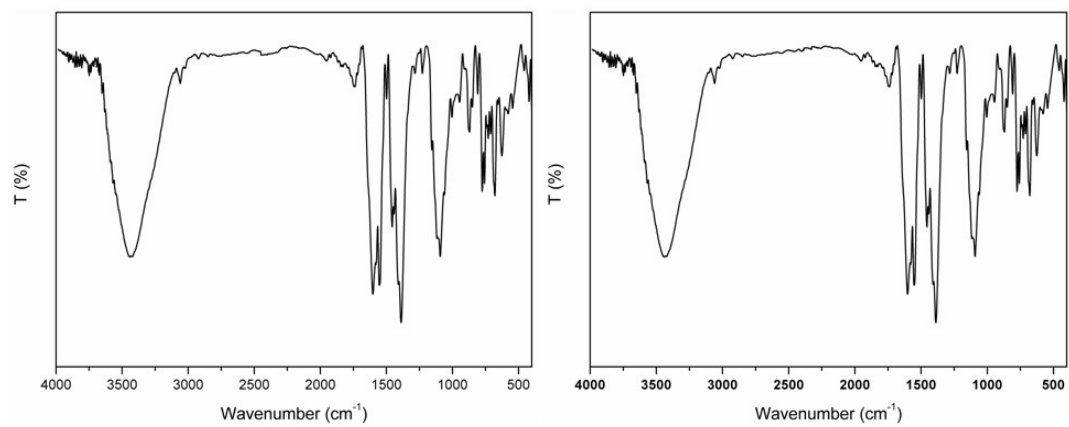

Figure S4. The IR spectra of **3** (left) and **4** (right).

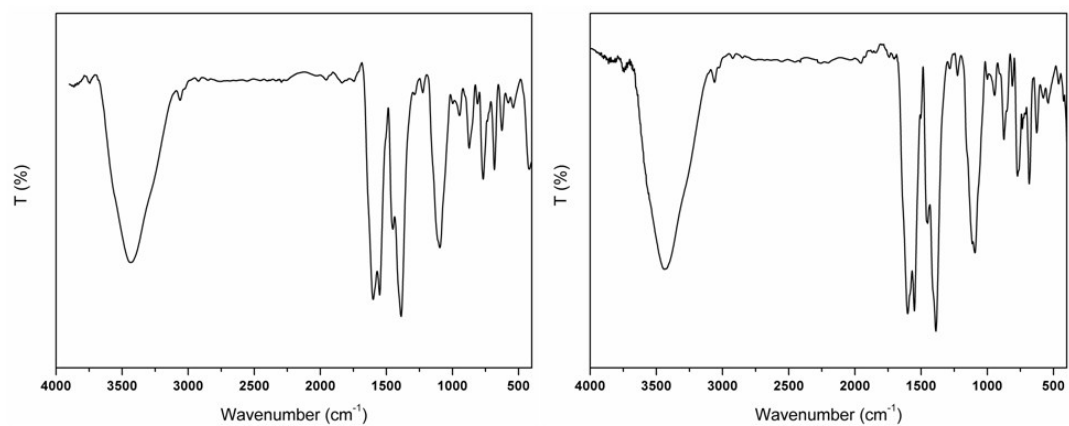

Figure S5. The IR spectra of **5** (left) and **6** (right).

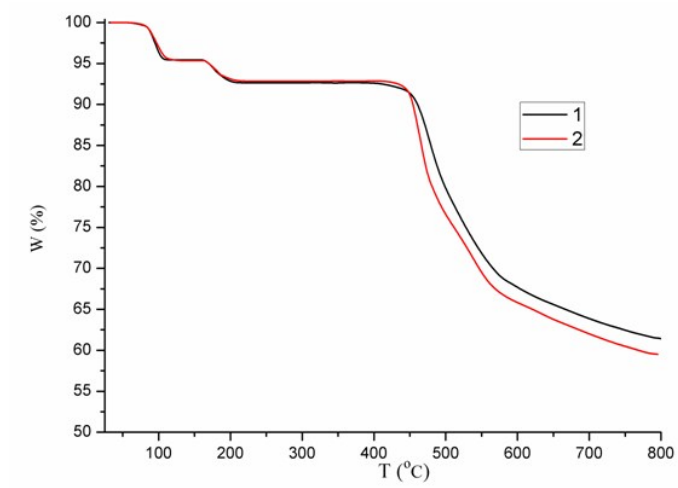

Figure S6. TGA curves of compounds **1** and **2**.

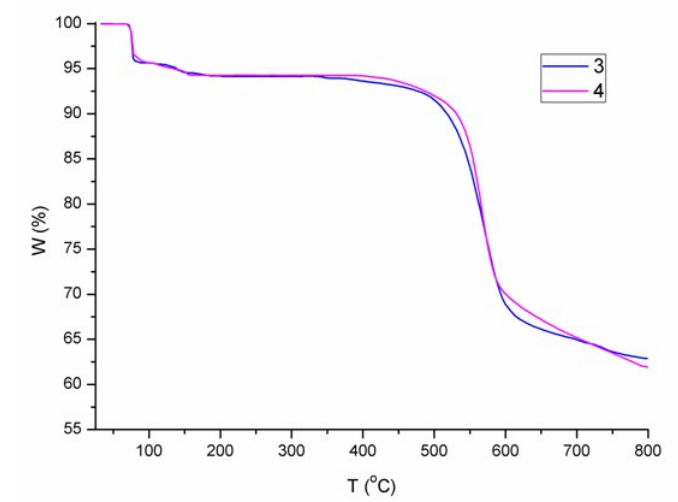

Figure S7. TGA curves of compounds **3** and **4**.

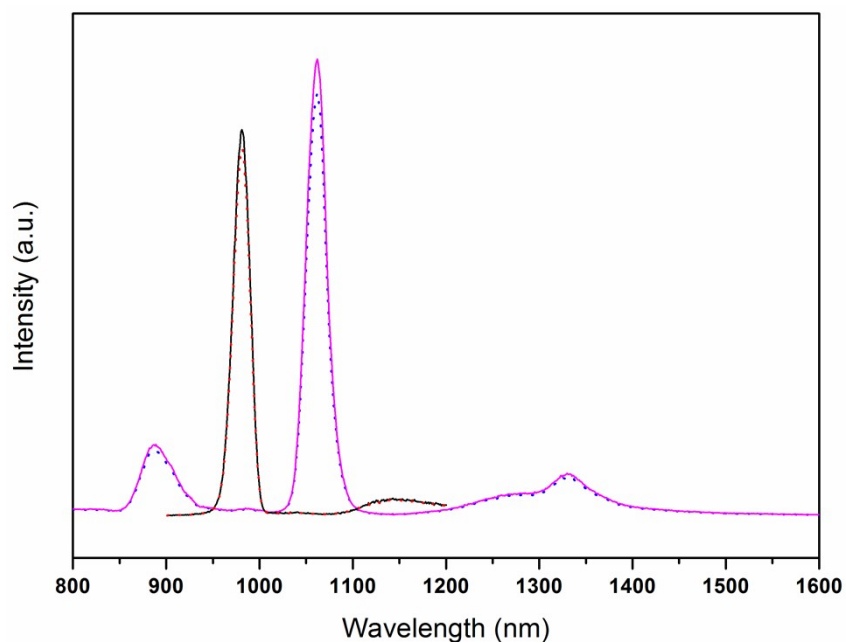

Figure S8. Solid-state emission spectra of **1** ( $\lambda_{\text{ex}}= 329$  nm) and **6** ( $\lambda_{\text{ex}}= 330$  nm) at room temperature, photoluminescent emission of **1** (dot blue curve) and **6** (dot red curve) recovers by immersed into acetonitrile at room temperature.

(a)

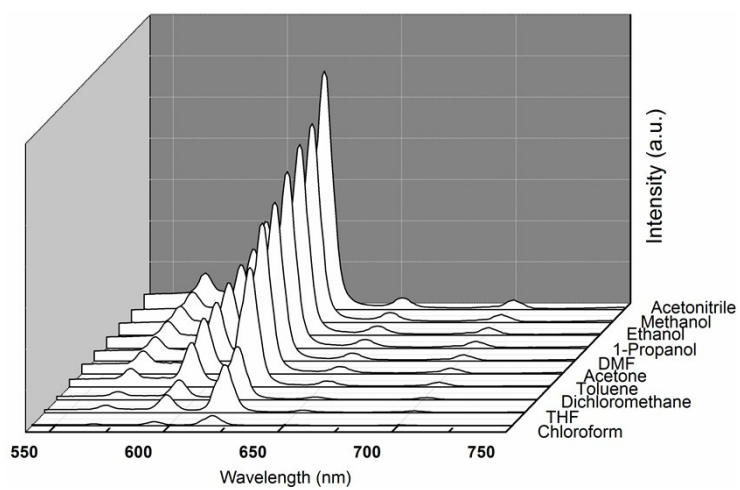

(b)

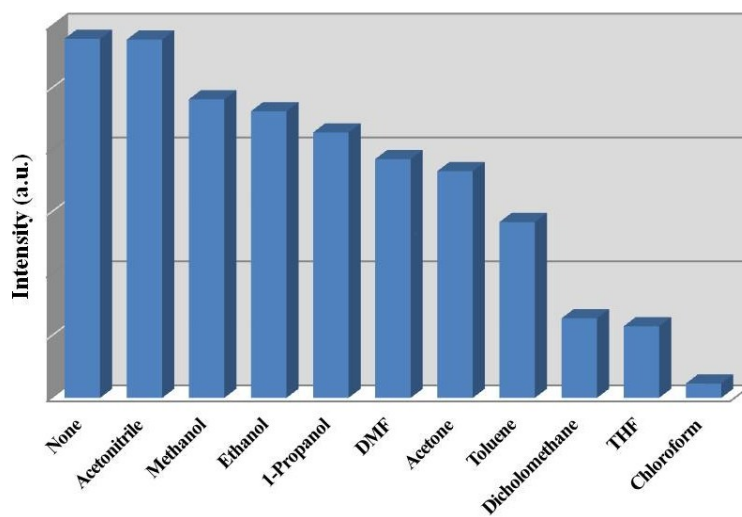

Figure S9. (a) Spectra and (b) the  $^5D_0 \rightarrow ^7F_2$  transition (619 nm) intensities of **2** in various pure solvent when excited at 325 nm.

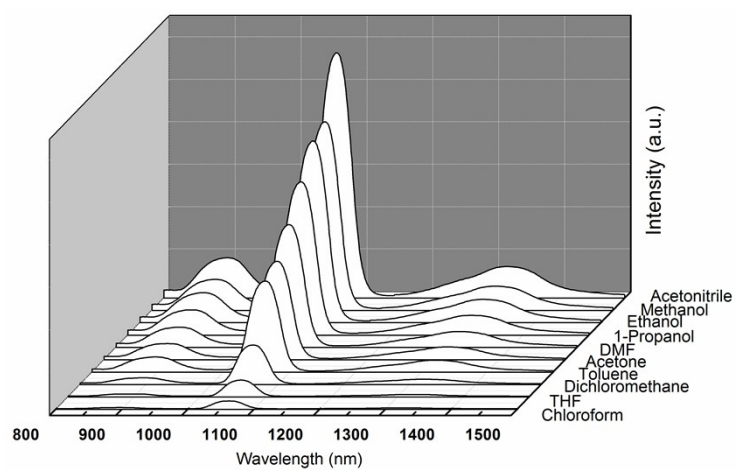

(b)

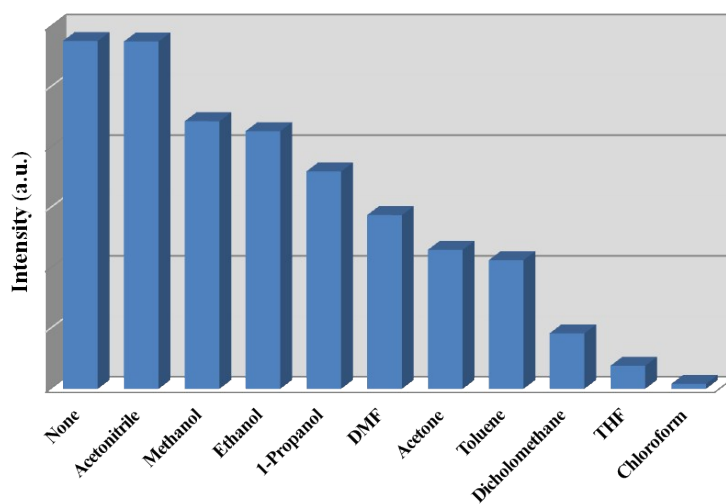

Figure 10. The  $^4F_{3/2} \rightarrow ^4I_{11/2}$  transition (1063 nm) intensities of **1** in various pure solvent when excited at 329 nm.

(a)

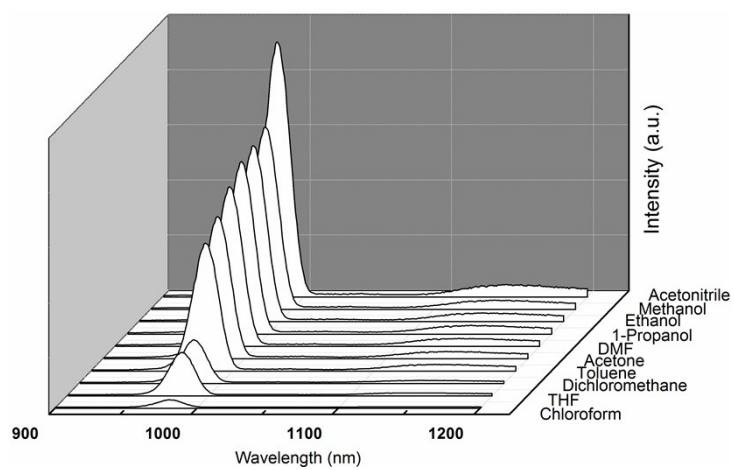

(b)

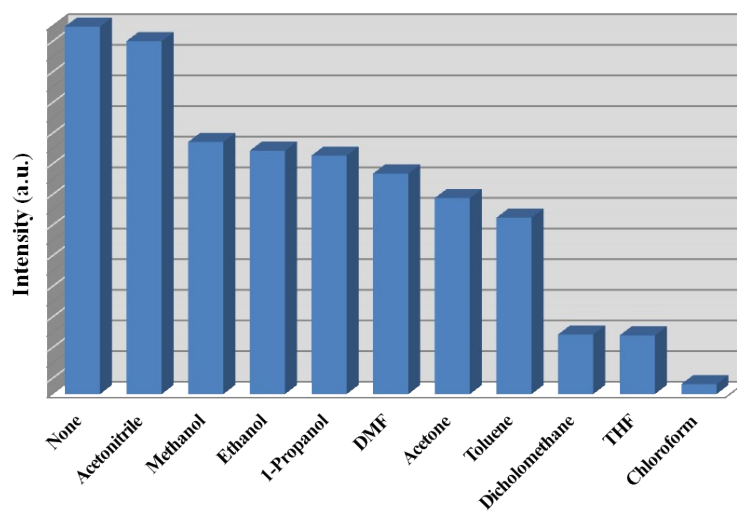

Figure S11. The  ${}^2F_{5/2} \rightarrow {}^7I_{7/2}$  transition (981nm) intensities of **6** in various pure solvent when excited at 330 nm.

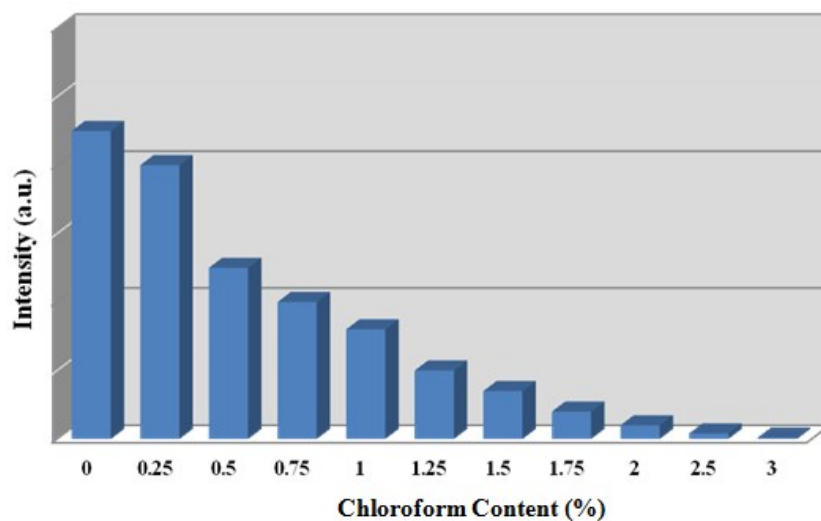

Figure S12. The  ${}^4F_{3/2} \rightarrow {}^4I_{11/2}$  transition (1063 nm) intensities of **1** after immersing in different amounts of chloroform,  $\lambda_{\text{ex}}=329$  nm.

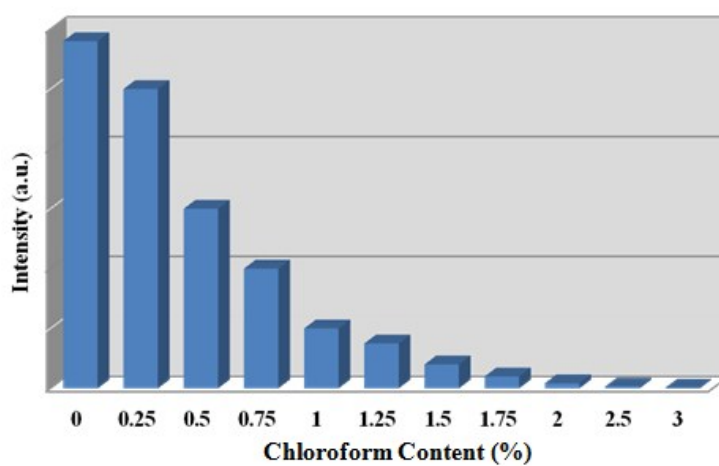

Figure S13. The  ${}^5D_0 \rightarrow {}^7F_2$  transition (619 nm) intensities of **2** after immersing in different amounts of chloroform,  $\lambda_{\text{ex}}=325$  nm.

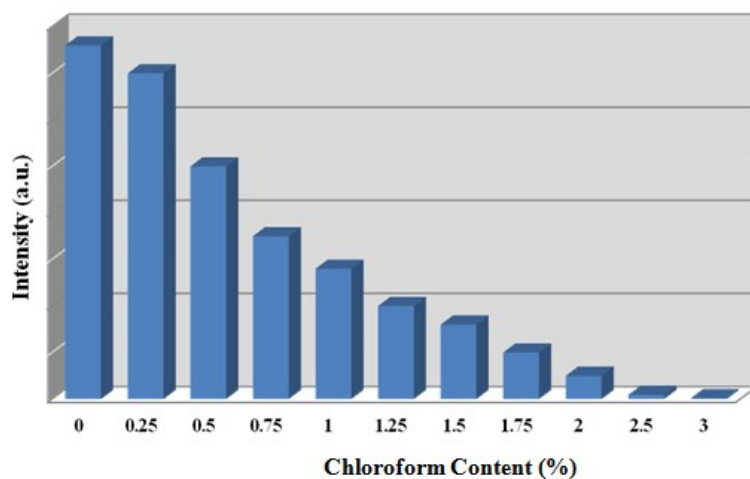

Figure S14. The  $^5D_4 \rightarrow ^7F_5$  transition (544 nm) intensities of **3** after immersing in different amounts of chloroform,  $\lambda_{\text{ex}}=319$  nm.

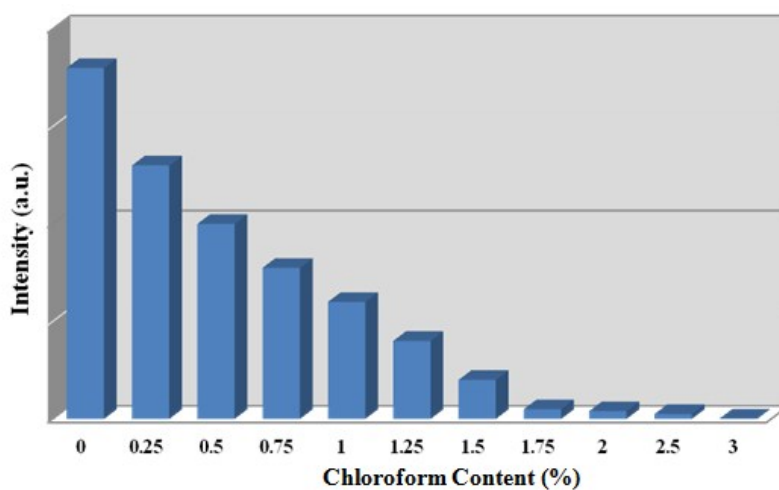

Figure S15. The  $^2F_{5/2} \rightarrow ^7I_{7/2}$  transition (981 nm) intensities of **6** after immersing in different amounts of chloroform,  $\lambda_{\text{ex}}=330$  nm.



Table S2. Structural pore size and solvent molecular sizes<sup>a</sup>.

| Substance                                          | Structural pore size and molecular size   |
|----------------------------------------------------|-------------------------------------------|
| <b>1-Ln</b>                                        | $8.9 \times 6.7 \text{ \AA}^2$            |
| <b>2-Ln</b>                                        | $7.6 \times 5.3 \text{ \AA}^2$            |
| CH <sub>3</sub> CN                                 | $5.5 \times 3.8 \times 3.7 \text{ \AA}^3$ |
| CH <sub>3</sub> OH                                 | $4.9 \times 3.9 \times 4.0 \text{ \AA}^3$ |
| C <sub>2</sub> H <sub>5</sub> OH                   | $5.1 \times 4.2 \times 4.8 \text{ \AA}^3$ |
| CH <sub>3</sub> CH <sub>2</sub> CH <sub>2</sub> OH | $7.5 \times 5.1 \times 5.0 \text{ \AA}^3$ |
| DMF                                                | $6.1 \times 6.0 \times 4.6 \text{ \AA}^3$ |
| (CH <sub>3</sub> ) <sub>2</sub> CO                 | $5.5 \times 6.0 \times 4.7 \text{ \AA}^3$ |
| Toluene                                            | $7.3 \times 7.2 \times 5.5 \text{ \AA}^3$ |
| Dichloromethane                                    | $4.9 \times 6.0 \times 5.2 \text{ \AA}^3$ |
| THF                                                | $5.5 \times 5.6 \times 6.2 \text{ \AA}^3$ |
| Chloroform                                         | $5.1 \times 5.2 \times 6.4 \text{ \AA}^3$ |

<sup>a</sup> These molecular sizes are calculated based on the MM2 energy minimization mode via Chem 3D program followed by measuring the longest atom-to-atom separations in two dimensions.
